# Supplementary material
Source: Research Square preprint supplement (doi:10.21203/rs.3.rs-9184882/v1)

**Fig1B**

293T

1 2 3 4

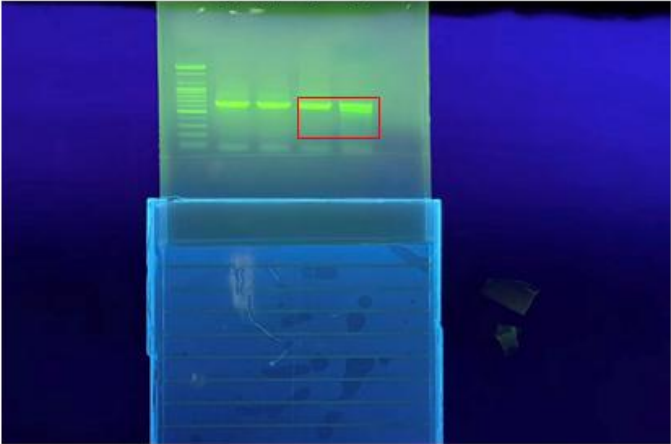

- Lane:
- 1. 293T BR JAK1 PCR
  - 2. 293T BRJ24 JAK1 PCR
  - 3. 293T BR JAK1 PCR+ T7E1 cut
  - 4. 293T BRJ24 JAK1 PCR+ T7E1 cut

VERO

1 2 3 4

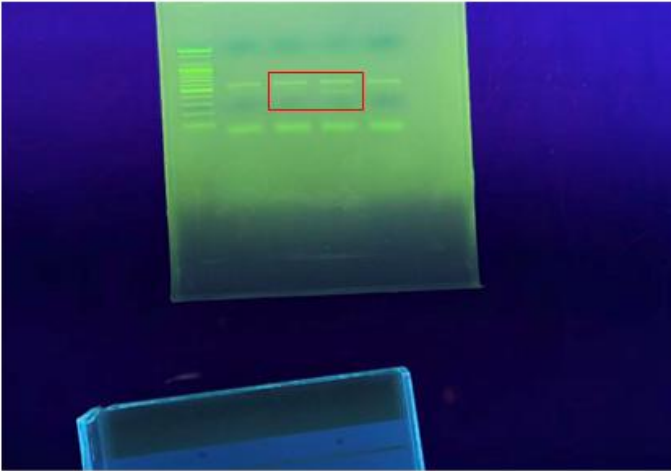

- Lane:
- 1. VERO BPR JAK1 PCR
  - 2. VERO BPR JAK1 PCR + T7E1 cut
  - 3. VERO BPRJ29 JAK1 PCR + T7E1 cut
  - 4. VERO BPRJ mix clones JAK1 PCR + T7E1 cut

MDCK

1 2 3 4

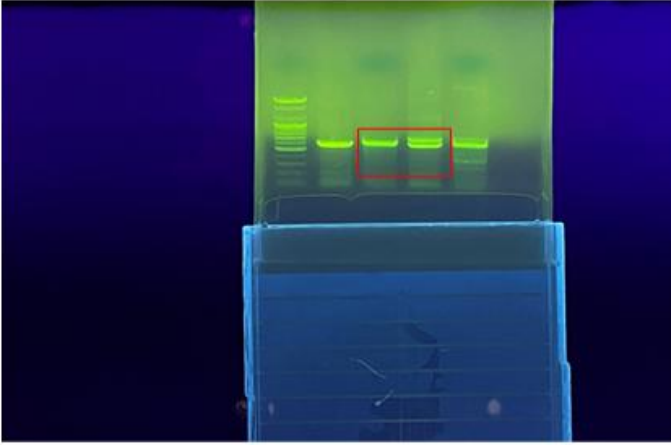

1. Lane:
- 2. MDCK BR JAK1 PCR
  - 3. MDCK BR JAK1 PCR+ T7E1 cut
  - 4. MDCK BRJ29 JAK1 PCR+ T7E1 cut
  - 5. MDCK BRJ mix clones JAK1 PCR+ T7E1 cut

# Fig1C

## 293T

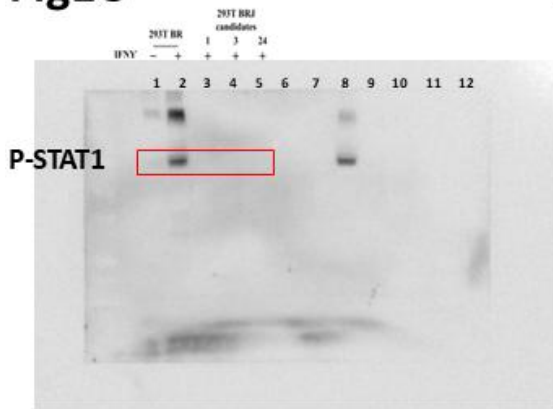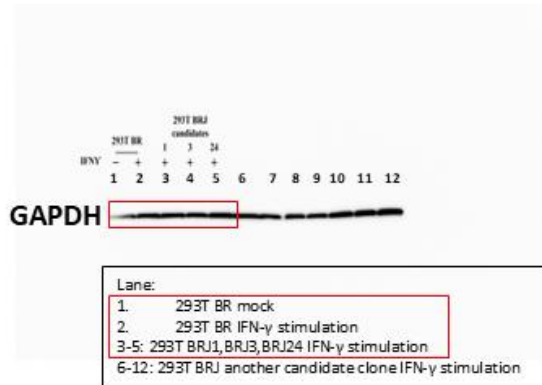

## VERO

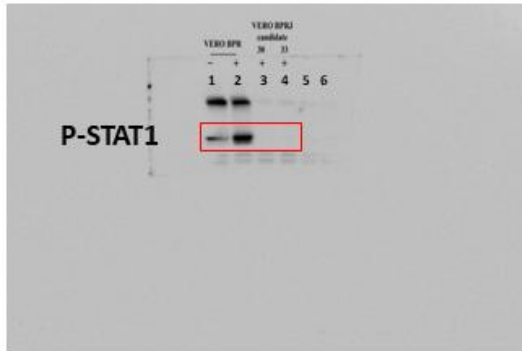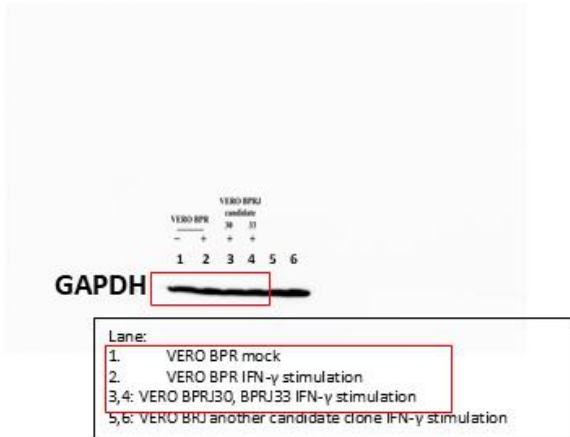

## MDCK

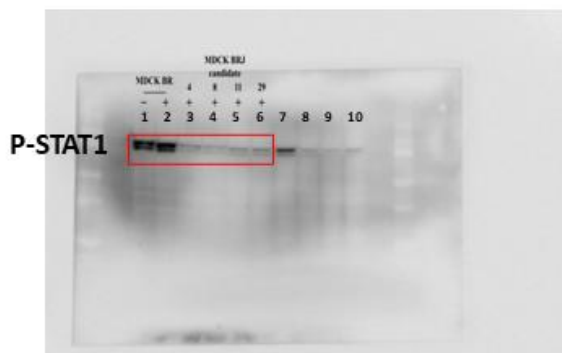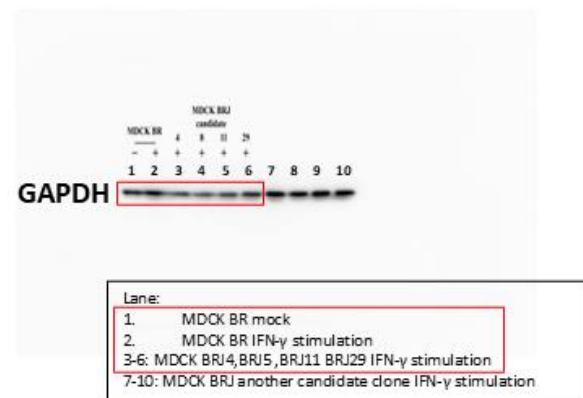

**Fig2A**

293T

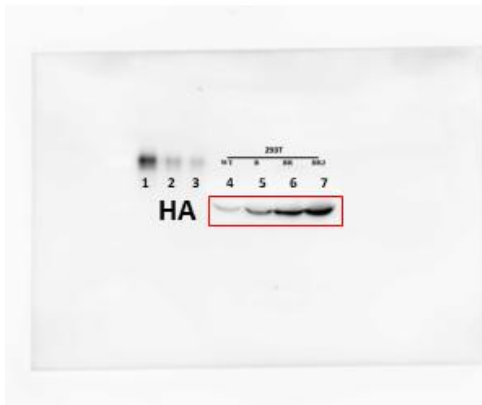

Lane:  
1-3: Recombinant H1N1 HA protein  
4-7: Influenza virus(A/Brisbane/59/2007) infection  
4. 293T WT (0.01 MOI)  
5. 293T B (0.01 MOI)  
6. 293T BR (0.01 MOI)  
7. 293T BRJ (0.01 MOI)

VERO

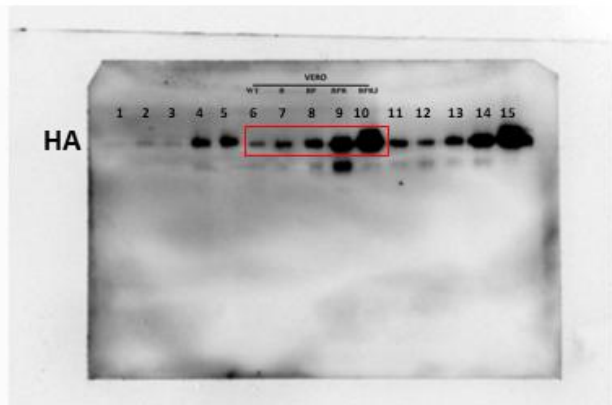

Lane:  
1-5: VERO WT,B,BP,BPR,BPRJ H1N1 (A/Brisbane/59/2007) infection( 0.1 MOI)  
6-10: VERO WT,B,BP,BPR,BPRJ H1N1 (A/Brisbane/59/2007) infection( 0.5 MOI)  
11-15: VERO WT,B,BP,BPR,BPRJ H1N1 (A/Brisbane/59/2007) infection( 1 MOI)

**Fig2B**

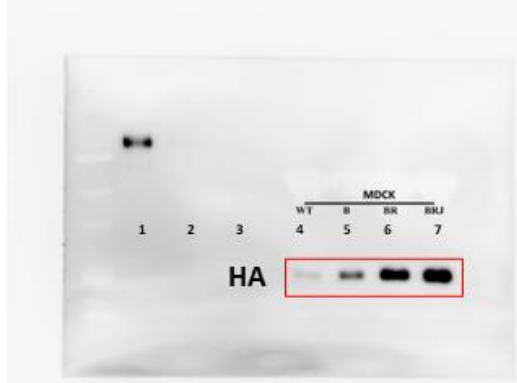

Lane:  
1-3: Recombinant H3N2 HA protein  
4-7: Influenza virus(A/brisbane/10/2007) infection  
4. MDCK WT (0.001 MOI)  
5. MDCK B (0.001 MOI)  
6. MDCK BR (0.001 MOI)  
7. MDCK BRJ (0.001 MOI)

**Fig2C**

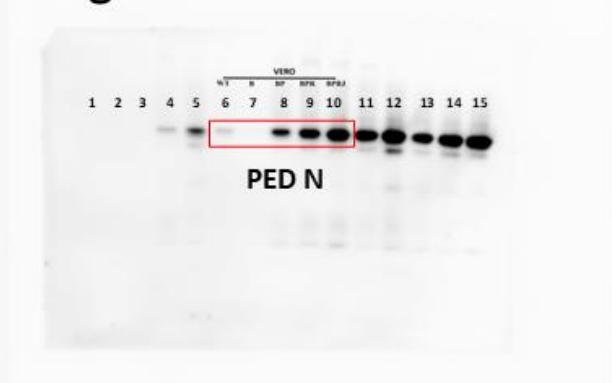

Lane:  
1-5: VERO WT,B,BP,BPR,BPRJ PEDV (CV777) infection (0.5μl infection)  
6-10: VERO WT,B,BP,BPR,BPRJ H1N1 (A/Brisbane/59/2007) infection(1 μl infection)  
11-15: VERO WT,B,BP,BPR,BPRJ H1N1 (A/Brisbane/59/2007) infection (2 μl infection)

**Fig2D**

**H1N1**

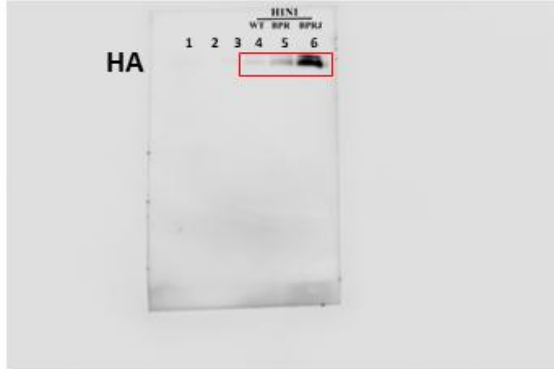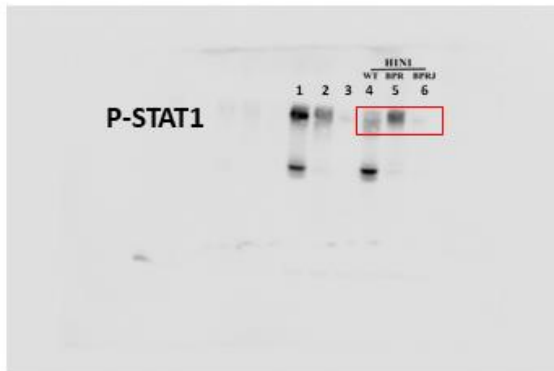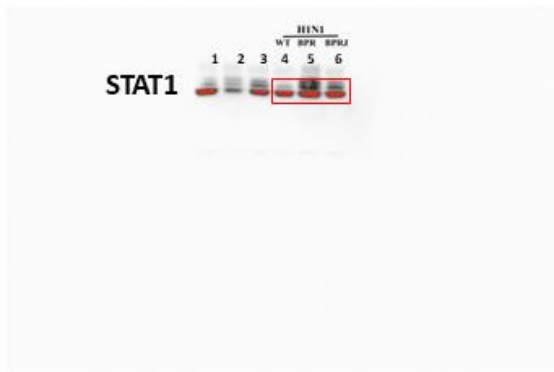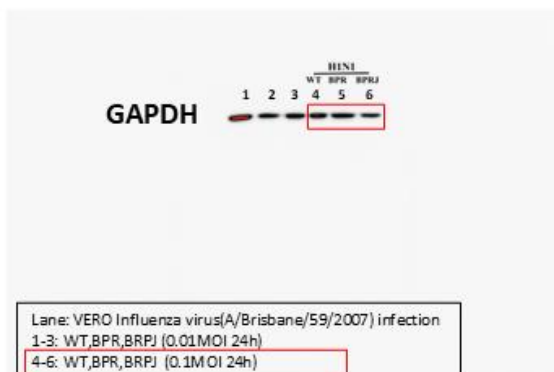

Lane: VERO Influenza virus(A/Brisbane/59/2007) infection  
1-3: WT,BPR,BRPJ (0.01MOI 24h)  
4-6: WT,BPR,BRPJ (0.1MOI 24h)

**PEDV**

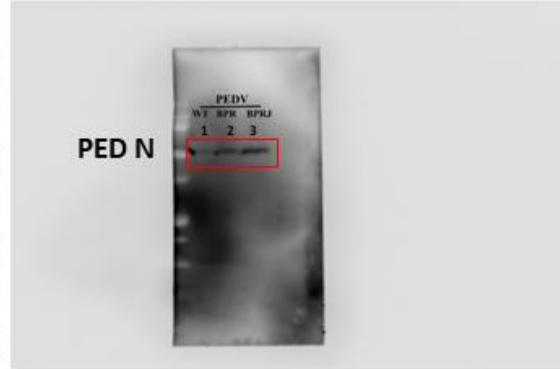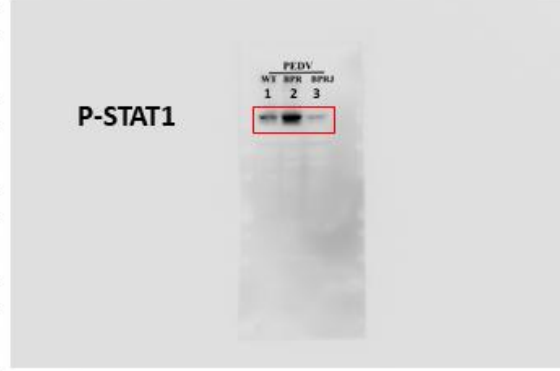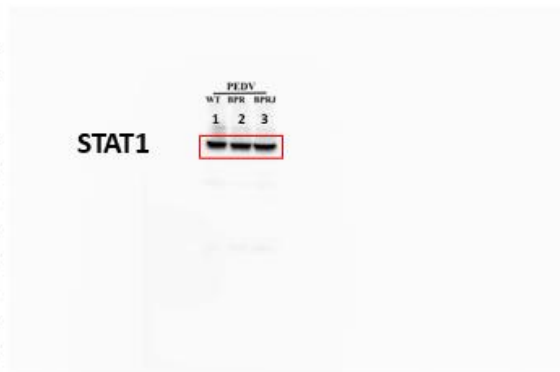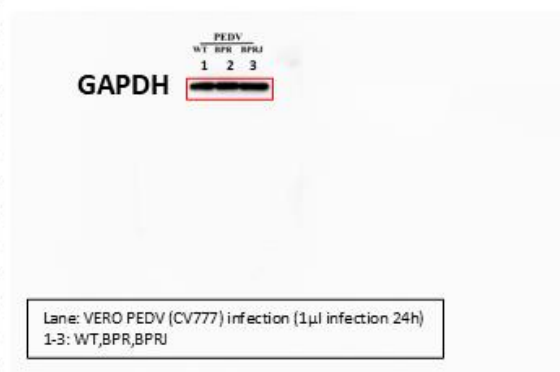

Lane: VERO PEDV (CV777) infection (1μl infection 24h)  
1-3: WT,BPR,BPRJ

**Fig5B**

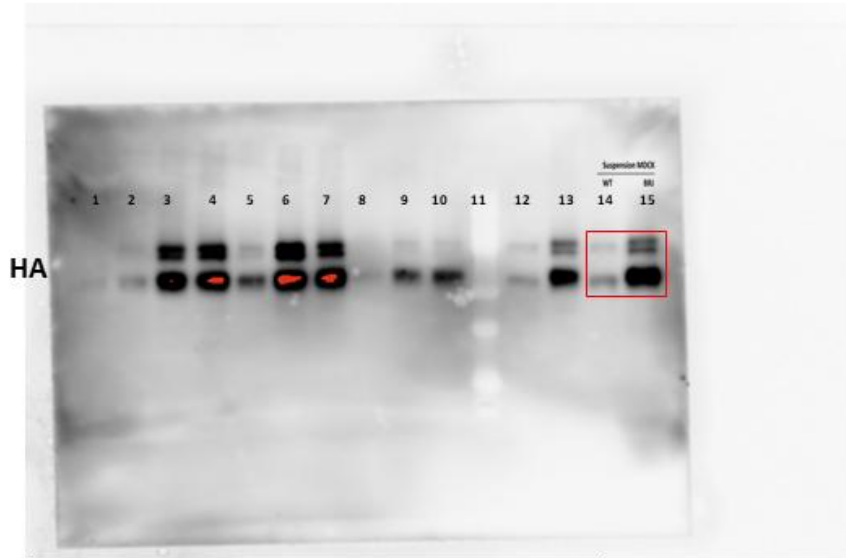

Lane: Influenza virus(A/brisbane/10/2007) infection  
 1: Adherent MDCK BRJ sample (0.1MOI)  
 2-4: suspension MDCK BRJ 48h,72h,96h sample (0.1MOI)  
 5-7: suspension MDCK BRJ 48h,72h,96h sample (0.05MOI)  
 8-10: suspension MDCK BRJ 48h,72h,96h sample (0.01MOI)  
 11: Ladder  
 12,13: suspension MDCK WT,BRJ 72h sample (0.05MOI)  
 14,15: suspension MDCK WT,BRJ 96h sample (0.05MOI)

**Fig5D**

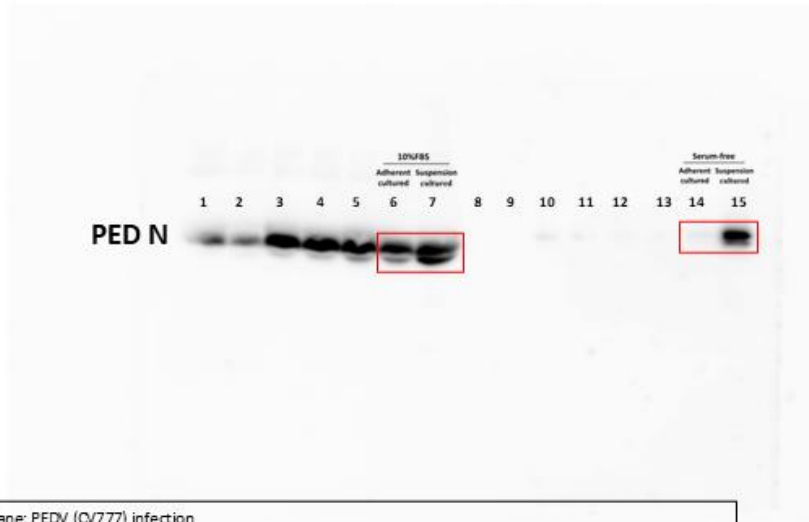

Lane: PEDV (CV777) infection  
 1-7: with 10% FBS virus production media  
 1-5: 0.0016  $\mu$ l, 0.008  $\mu$ l, 0.04  $\mu$ l, 0.2  $\mu$ l, 1  $\mu$ l virus infection to adherent VERO BPR  
 6: 5  $\mu$ l virus infection to adherent VERO BPR  
 7: 5  $\mu$ l virus infection to suspension VERO BPR  
 8: Empty  
 9-15: with serum virus production media  
 9-13: 0.0016  $\mu$ l, 0.008  $\mu$ l, 0.04  $\mu$ l, 0.2  $\mu$ l, 1  $\mu$ l virus infection to adherent VERO BPR  
 14: 5  $\mu$ l virus infection to adherent VERO BPR  
 15: 5  $\mu$ l virus infection to suspension VERO BPR

## Fig Supply A

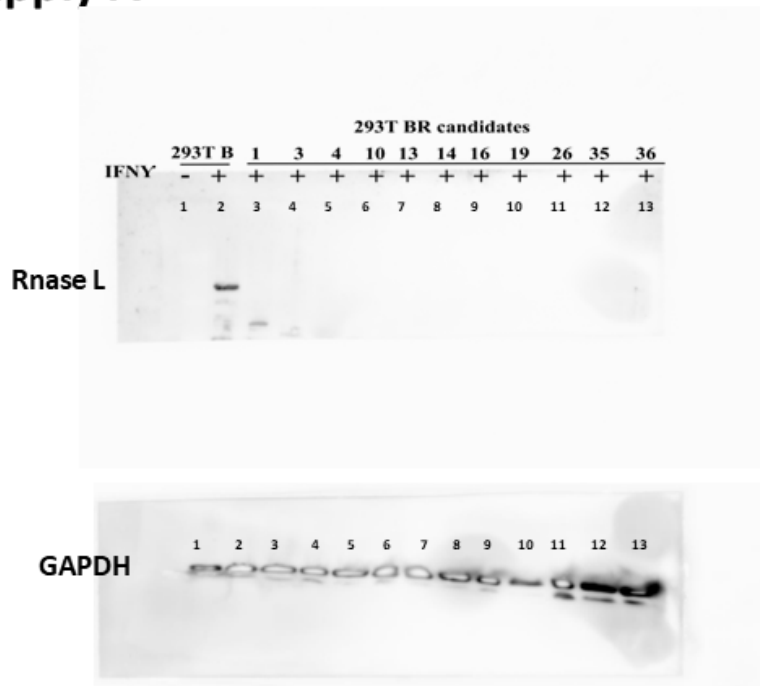

Lane:  
 1: 293T B mock  
 2: 293T B IFN- $\gamma$  stimulation  
 3-13: 293T BR candidates clone IFN- $\gamma$  stimulation

## Fig Supply D

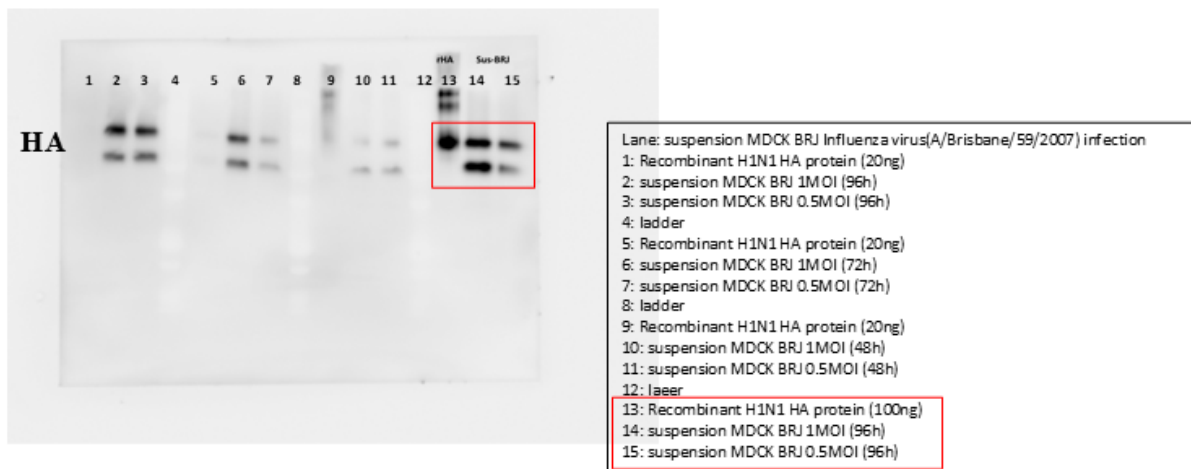

Supplement: Supplementary file 2 [file da7a3dd8b738d8400026fefd.pdf]
