# Supplementary material
Source: Research Square preprint supplement (doi:10.21203/rs.3.rs-9184882/v1)
Supplement: Supplementary file 1 [file 736cd476c88aa7178afbe6e7.pdf]

**Table S1 Sequence Variants Induced by Knockout**

| 293T-BRJ              |                                                                                                                                                                                                                                                                                                                                                          | Sequences |  |  |  |  |  |  |  |  |  |  |  |  |  |  |  | Alterations |
|-----------------------|----------------------------------------------------------------------------------------------------------------------------------------------------------------------------------------------------------------------------------------------------------------------------------------------------------------------------------------------------------|-----------|--|--|--|--|--|--|--|--|--|--|--|--|--|--|--|-------------|
| BST2 WT seq.<br>A.A   | AAG CGC TGT AAG CTT CTG CTG GGG ATA GGA ATT CTG GTG CTC CTG ATC ATC GTG ATT CTG GGG                                                                                                                                                                                                                                                                      | wild type |  |  |  |  |  |  |  |  |  |  |  |  |  |  |  |             |
| Chr1.mutant<br>A.A    | AAG CGC TGT AAG CTT <b>CGG AAT TCT GGT GCT CCT GAT CAT CGT GAT TCT GGG ~ ACC TGA</b>                                                                                                                                                                                                                                                                     | Δ11       |  |  |  |  |  |  |  |  |  |  |  |  |  |  |  |             |
| Chr2.mutant<br>A.A    | AAG <b>CGG AAT TCT GGT GCT CCT GAT CAT CGT GAT TCT GGG GGT GCC CTT GAT ~ ACC TGA</b>                                                                                                                                                                                                                                                                     | Δ23       |  |  |  |  |  |  |  |  |  |  |  |  |  |  |  |             |
| RNaseL WT seq.<br>A.A | <sup>2495</sup> <sup>2498</sup> <sup>2501</sup> <sup>2504</sup> <sup>2507</sup> <sup>2510</sup> <sup>2513</sup> <sup>2516</sup> <sup>2519</sup> <sup>2522</sup> <sup>2525</sup> <sup>2528</sup> <sup>2531</sup> <sup>2534</sup> <sup>2537</sup> <sup>2540</sup> <sup>2678</sup><br>CAT AAC AAC CCC CAG GAG GGA CCC ACG TCC TCC AGC GGT AGA AGG GCT ~ GTA | wild type |  |  |  |  |  |  |  |  |  |  |  |  |  |  |  |             |
| Chr1.mutant<br>A.A    | <sup>2495</sup> <sup>2498</sup> <sup>2501</sup> <sup>2504</sup> <sup>2507</sup> <sup>2510</sup> <sup>2513</sup> <sup>2516</sup> <sup>2519</sup> <sup>2522</sup> <sup>2525</sup> <sup>2528</sup> <sup>2531</sup> <sup>2534</sup><br>CAT AAC AAC CCC <b>CCA GGA GGG ACC CAC GTC CTC CAG CGG TAG</b>                                                        | +1        |  |  |  |  |  |  |  |  |  |  |  |  |  |  |  |             |
| Chr2.mutant<br>A.A    | <sup>2495</sup> <sup>2498</sup> <sup>2501</sup> <sup>2504</sup> <sup>2507</sup> <sup>2510</sup> <sup>2513</sup> <sup>2516</sup> <sup>2519</sup> <sup>2522</sup> <sup>2525</sup> <sup>2528</sup> <sup>2531</sup> <sup>2534</sup> <sup>2675</sup> <sup>2678</sup><br>CAT AAC AGG AGG GAC CCA CGT CCT CCA GCG GTA GAA GGG CTG ~ AAA <b>TGA</b>              | Δ7        |  |  |  |  |  |  |  |  |  |  |  |  |  |  |  |             |
| Chr3.mutant<br>A.A    | <sup>2495</sup> <sup>2498</sup> <sup>2501</sup> <sup>2504</sup> <sup>2507</sup> <sup>2510</sup> <sup>2513</sup> <sup>2516</sup> <sup>2519</sup> <sup>2522</sup><br>CAT AAC AAC CCC CAC GTC CTC CAG CGG <b>TAG</b>                                                                                                                                        | Δ11       |  |  |  |  |  |  |  |  |  |  |  |  |  |  |  |             |
| JAK1 WT seq.          | GCC CCC CCG TTG ATC GTC CAC AAC ATA CAG AAT GGC TGT CAT GGT CCA ATC TGG TTG GTC                                                                                                                                                                                                                                                                          | wild type |  |  |  |  |  |  |  |  |  |  |  |  |  |  |  |             |
| Chr1.mutant<br>A.A    | GCC CCG TCC ACA ACA TAC AGA ATG GCT GTC ATG GTC CAA TCT GGT TGG TCC <b>TAG</b>                                                                                                                                                                                                                                                                           | Δ10       |  |  |  |  |  |  |  |  |  |  |  |  |  |  |  |             |
| Chr2.mutant<br>A.A    | GCC CCC CCG TTG TCC ACA TAC AGA ATG GCT GTC ATG GTC CAA TCT GGT TGG TCC <b>TAG</b>                                                                                                                                                                                                                                                                       | Δ4        |  |  |  |  |  |  |  |  |  |  |  |  |  |  |  |             |
| Chr3.mutant<br>A.A    | GCC CCC CCG TTG ACA TAC AGA ATG GCT GTC ATG GTC CAA TCT GGT TGG TCC <b>TAG</b>                                                                                                                                                                                                                                                                           | Δ10       |  |  |  |  |  |  |  |  |  |  |  |  |  |  |  |             |
| VERO BPRJ             |                                                                                                                                                                                                                                                                                                                                                          | Sequences |  |  |  |  |  |  |  |  |  |  |  |  |  |  |  | Alterations |
| BST2 WT chr.<br>A.A   | GTG CTT CTG GGG GTG CCC CTG ATT TTC TTC ATC ATC AAG GCC ~ TGT TAA                                                                                                                                                                                                                                                                                        | wild type |  |  |  |  |  |  |  |  |  |  |  |  |  |  |  |             |
| Chr1.mutant<br>A.A    | GTG CTT CTG GGG GTG CCC <b>TGA</b>                                                                                                                                                                                                                                                                                                                       | Δ1        |  |  |  |  |  |  |  |  |  |  |  |  |  |  |  |             |
| Chr2.mutant<br>A.A    | GTG CTT <b>CTT GCC CCT GAT TTT CTT CAT ~ GGG TAG</b>                                                                                                                                                                                                                                                                                                     | Δ5        |  |  |  |  |  |  |  |  |  |  |  |  |  |  |  |             |
| PKR WT chr.<br>A.A    | ATA CAG GAC CTC CAC ATG ATA GGA GGT AAG TTG                                                                                                                                                                                                                                                                                                              | wild type |  |  |  |  |  |  |  |  |  |  |  |  |  |  |  |             |
| Chr1.mutant<br>A.A    | ATA CAG GAC CTC CAC ATG AGG AGG TAA                                                                                                                                                                                                                                                                                                                      | Δ2        |  |  |  |  |  |  |  |  |  |  |  |  |  |  |  |             |
| Chr2.mutant<br>A.A    | ATA CAG GAC CTC CAC ATG <b>ATG TGT AGG AGG TAA</b>                                                                                                                                                                                                                                                                                                       | +4        |  |  |  |  |  |  |  |  |  |  |  |  |  |  |  |             |
| RNaseL WT seq.<br>A.A | ATG ATA GCC AGG CGG AAT TAT GAC CAT TCC CTT GTG AAG                                                                                                                                                                                                                                                                                                      | wild type |  |  |  |  |  |  |  |  |  |  |  |  |  |  |  |             |
| Chr1.mutant<br>A.A    | ATG ATA GCC <b>CAG GCG GAA TTA TGA</b>                                                                                                                                                                                                                                                                                                                   | +1        |  |  |  |  |  |  |  |  |  |  |  |  |  |  |  |             |
| Chr2.mutant<br>A.A    | ATG ATA GCC <b>GGC GGA ATT ATG ACC ATT CCC TTG TGA</b>                                                                                                                                                                                                                                                                                                   | Δ1        |  |  |  |  |  |  |  |  |  |  |  |  |  |  |  |             |
| JAK1 WT chr.<br>A.A   | GTG GAC GAT CAA CGG GGG GGC CAC GTC GGT GCA GAG GTA ATG ATG GGC GTC TGC GGT GAG                                                                                                                                                                                                                                                                          | wild type |  |  |  |  |  |  |  |  |  |  |  |  |  |  |  |             |
| Chr1.mutant<br>A.A    | GTG GAC GAT <b>TCA ACG GGG GGC CCA CGT CGG TGC AGA GGT AAT GAT GGG CGT CTG CGG TGA</b>                                                                                                                                                                                                                                                                   | +1        |  |  |  |  |  |  |  |  |  |  |  |  |  |  |  |             |
| Chr2.mutant<br>A.A    | GTG GAC ACG TCG GTG CAG AGG TAA                                                                                                                                                                                                                                                                                                                          | Δ16       |  |  |  |  |  |  |  |  |  |  |  |  |  |  |  |             |

| MDCK BRJ              | Sequences |     |     |     |     |     |     |     |     |     |     |     |     |     |     |     |     |     |     | Alterations |     |           |
|-----------------------|-----------|-----|-----|-----|-----|-----|-----|-----|-----|-----|-----|-----|-----|-----|-----|-----|-----|-----|-----|-------------|-----|-----------|
| BST2 WT seq.<br>A.A   | CCC       | ATA | ACT | GAC | GAG | TCA | GAG | TCA | ATG | TCA | TCA | AGT | CAG | AAG | CTG | AGC | TGG | CTG | GAG | TGG         | CTG | wild type |
| Chr1.mutant<br>A.A    | CCC       | ATA | ACT | AGA | GTC | AGA | GTC | AAT | GTC | ATC | AAG | TCA | GAA | GCT | GAG | CGT | GCT | ~   | AGT | TGA         | *   | Δ3,+1     |
| Chr2.mutant<br>A.A    | CCC       | ATA | ACT | GAT | CAG | AGT | CAA | TGT | CAT | CAA | GTC | AGA | AGC | TGA |     |     |     |     |     |             |     | Δ4        |
| RNaseL WT seq.<br>A.A | ACA       | TCA | GTT | GAT | GGC | AAT | CAG | TTG | ATC | CAA | GCT | ATT | AAA | AAA | GAA | GAC | ATT | AAG | CTG |             |     | wild type |
| Chr1.mutant<br>A.A    | ACA       | TCA | GTT | GGA | TGG | CAA | TCA | GTT | GAT | CCA | AGC | TAT | TAA | *   |     |     |     |     |     |             |     | +1        |
| Chr2.mutant<br>A.A    | ACA       | TCA | GTA | TGG | ATG | GCA | ATC | AGT | TGA |     |     |     |     |     |     |     |     |     |     |             |     | +2        |
| JAK1 WT chr.<br>A.A   | GTG       | GAC | GAT | CAA | TGG | GGG | AGC | CAC | ATC | AGT | GCA | GAG | GTA | ATG | ATG | GGC | ATC | TGC | TGT | GAG         |     | wild type |
| Chr1.mutant<br>A.A    | GTG       | GAC | GAT | TTC | AAT | GGG | GGA | GCC | CAC | TCA | GTG | CAG | AGG | TAA | *   |     |     |     |     |             |     | +2        |
| Chr2.mutant<br>A.A    | GTG       | GAC | GAT | ACA | ATG | GGG | GAG | CCA | CAT | CAG | TGC | AGA | GGT | AAT | GAT | GGG | CAT | CTG | CTG | TGA         | *   | +1        |

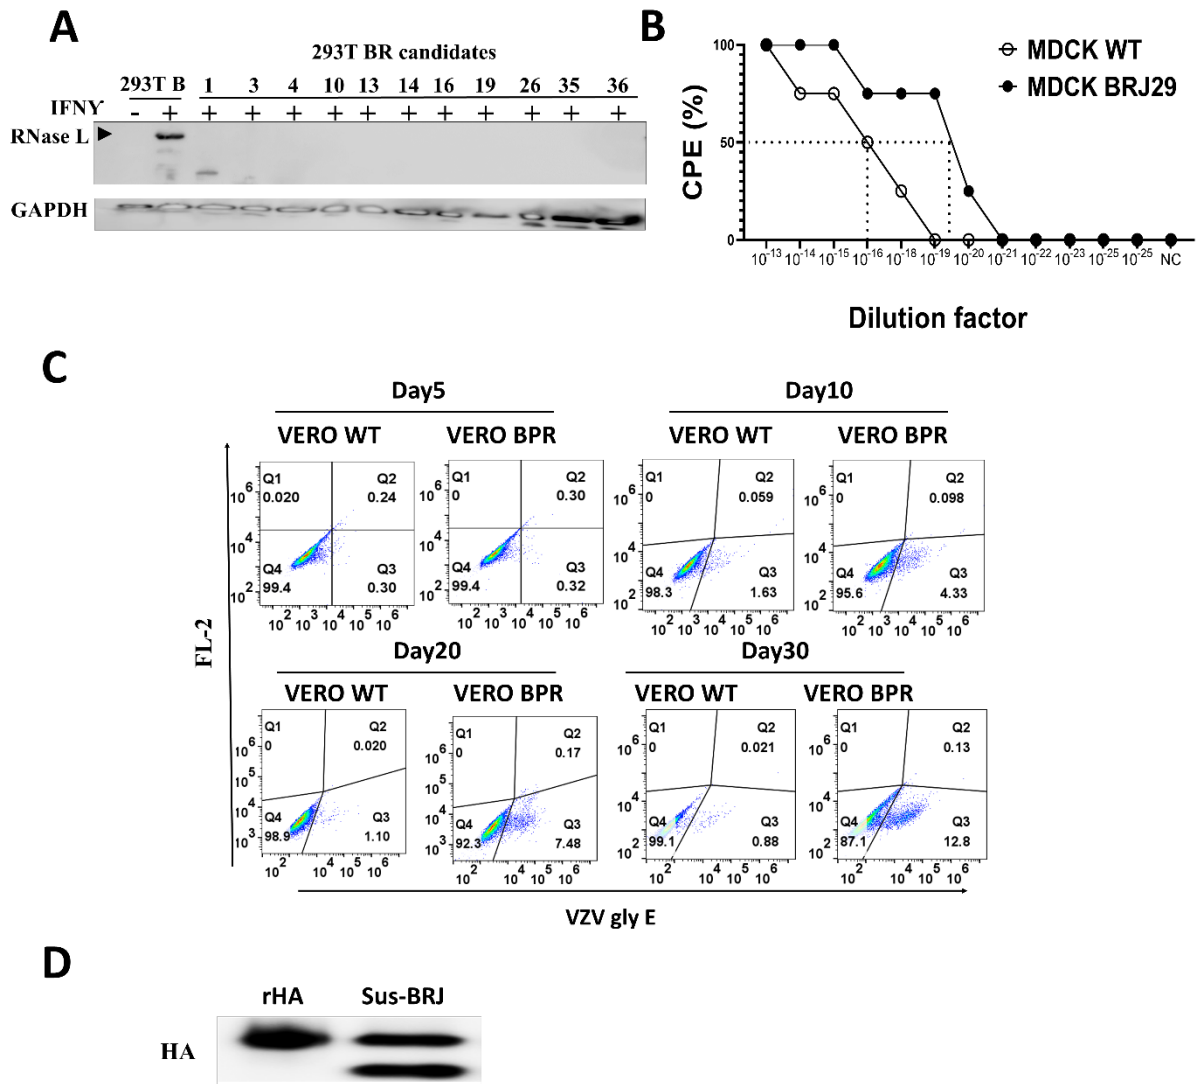

### S1. Enhanced virus production in multi-gene knockout cell lines

- (A) RNase L gene deficiency abolished IFN $\gamma$ -induced RNase L expression. Arrow point to RNase L.
- (B) Influenza B virus, the Yamagata (B/Wisconsin/1/2010) strain was produced in MDCK WT and BRJ cells, and then an equal volume of culture supernatant was serially diluted and inoculated into MDCK WT cells, and the virus titer was measured as the percentage of cytopathic effect.
- (C) Expression of VZV glycoprotein E in Vero WT and BPR cells during serial passage of VZV (Oka strain).
- (D) 100ng of recombinant HA protein (Sinobiological, 11052-V08H-50) and 4  $\mu$ l of serum-free and suspension culture supernatant from MDCK-BRJ cells infected with influenza H1N1 were compared by Western blotting.
